# Supplementary material for: Evolution of Escherichia coli rifampicin resistance in an antibiotic-free environment during thermal stress
Source: PubMed Central journal article supplement (PMC3598500; doi:10.1186/1471-2148-13-50), 2013-02-22
Supplement: 1471-2148-13-50-S2.pdf [file 1471-2148-13-50-S2.pdf]

**Table S1.** Oligonucleotides and primers used in this study.

**Oligos used for recombineering to create *rpoB* mutants**

|       |                                                                                                                   |
|-------|-------------------------------------------------------------------------------------------------------------------|
| 1572F | 5'- ATC GAA ACC CCT GAA GGT CCG AAC ATC GGT CTG <u>I</u> TC AAC TCT<br>CTG TCC GTG TAC GCA CAG ACT AAC GAA TA -3' |
| 1572L | 5'- ATC GAA ACC CCT GAA GGT CCG AAC ATC GGT CTG <u>C</u> TC AAC TCT<br>CTG TCC GTG TAC GCA CAG ACT AAC GAA TA -3' |
| 1572N | 5'- ATC GAA ACC CCT GAA GGT CCG AAC ATC GGT CTG <u>A</u> AC AAC TCT<br>CTG TCC GTG TAC GCA CAG ACT AAC GAA TA -3' |

**Primer pair used for PCR amplification of *rpoB* region**

|              |                                     |
|--------------|-------------------------------------|
| 1572 Forward | 5'- ACA ACC CGC TGT CTG AGA TT -3'  |
| 1572 Reverse | 5'- TGG GTG GAT ACG TCC ATG TAG -3' |
