# Supplementary material for: Evolution of Escherichia coli rifampicin resistance in an antibiotic-free environment during thermal stress
Source: PubMed Central journal article supplement (PMC3598500; doi:10.1186/1471-2148-13-50), 2013-02-22
Supplement: 1471-2148-13-50-S3.pdf [file 1471-2148-13-50-S3.pdf]

**Table S2.** Parameters of fixation estimated from the frequency trajectories.

| High temperature adapted lines | Codon change | Phenotype (MIC in Rifampicin) | $S_{up}$ | $\tau_{up}$ (generations) | $\tau_{fix}$ (generations) |
|--------------------------------|--------------|-------------------------------|----------|---------------------------|----------------------------|
| 35                             | I572L        | 100 $\mu\text{g}/\text{mL}$   | 0.077    | 1                         | 92                         |
| 97                             | I572L        | 100 $\mu\text{g}/\text{mL}$   | 0.056    | 2                         | 154                        |
| 43                             | I572N        | 25 $\mu\text{g}/\text{mL}$    | 0.049    | 90                        | 105                        |
| 56                             | I572F        | 800 $\mu\text{g}/\text{mL}$   | 0.038    | 100                       | Not fixed                  |
| 61                             | I572F        | 800 $\mu\text{g}/\text{mL}$   | 0.033    | 202                       | 236                        |
| 27                             | I572L        | 100 $\mu\text{g}/\text{mL}$   | 0.028    | 102                       | 211                        |
| 112                            | I572N        | 50 $\mu\text{g}/\text{mL}$    | 0.021    | 101                       | 186                        |
| 131                            | I572N        | 25 $\mu\text{g}/\text{mL}$    | 0.019    | 106                       | Not fixed                  |
| 142                            | I572L        | 100 $\mu\text{g}/\text{mL}$   | 0.015    | 50                        | 899                        |
| 77                             | I572N        | 25 $\mu\text{g}/\text{mL}$    | 0.006    | 838                       | 1133                       |
| 92                             | I572L        | 100 $\mu\text{g}/\text{mL}$   | 0.005    | 223                       | 977                        |
| 4                              | I572N        | 50 $\mu\text{g}/\text{mL}$    | 0.003    | 405                       | 673                        |
