# Supplementary material for: Evolution of Escherichia coli rifampicin resistance in an antibiotic-free environment during thermal stress
Source: PubMed Central journal article supplement (PMC3598500; doi:10.1186/1471-2148-13-50), 2013-02-22
Supplement: 1471-2148-13-50-S4.pdf [file 1471-2148-13-50-S4.pdf]

**Table S3.** Relative fitness measured in different conditions and different genetic backgrounds.

| Genetic background                 | Fitness assay at | Mutant             | Codon Change | Relative fitness ( $\pm 95\%CI$ ) <sup>1</sup> | p-value <sup>2</sup> | n  | Phenotypic effect      |
|------------------------------------|------------------|--------------------|--------------|------------------------------------------------|----------------------|----|------------------------|
| REL 1206<br>(Ancestral background) | 42.2°C in DM25   | A <sup>Rif</sup> 1 | I572F        | 1.246 $\pm$ 0.012                              | <b>&lt;0.0001***</b> | 6  | <b>24.6% Advantage</b> |
|                                    |                  | A <sup>Rif</sup> 2 | I572L        | 1.211 $\pm$ 0.018                              | <b>&lt;0.0001***</b> | 6  | <b>21.1% Advantage</b> |
|                                    |                  | A <sup>Rif</sup> 3 | I572N        | 1.182 $\pm$ 0.020                              | <b>0.0001***</b>     | 6  | <b>18.2% Advantage</b> |
|                                    | 37°C in DM25     | A <sup>Rif</sup> 1 | I572F        | 0.981 $\pm$ 0.013                              | 0.0893               | 12 | Neutral                |
|                                    |                  | A <sup>Rif</sup> 2 | I572L        | 0.944 $\pm$ 0.017                              | <b>0.011*</b>        | 6  | <b>5.6% Cost</b>       |
|                                    |                  | A <sup>Rif</sup> 3 | I572N        | 0.942 $\pm$ 0.016                              | <b>0.0064**</b>      | 6  | <b>5.8% Cost</b>       |
|                                    | 42.2°C in DM1000 | A <sup>Rif</sup> 1 | I572F        | 0.969 $\pm$ 0.055                              | 0.2944               | 12 | Neutral                |
|                                    |                  | A <sup>Rif</sup> 2 | I572L        | 0.981 $\pm$ 0.015                              | 0.1155               | 12 | Neutral                |
|                                    |                  | A <sup>Rif</sup> 3 | I572N        | 1.005 $\pm$ 0.017                              | 0.6065               | 12 | Neutral                |
|                                    | 37°C in DM1000   | A <sup>Rif</sup> 1 | I572F        | 0.956 $\pm$ 0.017                              | <b>0.0135*</b>       | 12 | <b>4.4% Cost</b>       |
|                                    |                  | A <sup>Rif</sup> 2 | I572L        | 0.963 $\pm$ 0.015                              | <b>0.0147*</b>       | 12 | <b>3.7% Cost</b>       |
|                                    |                  | A <sup>Rif</sup> 3 | I572N        | 0.947 $\pm$ 0.017                              | <b>0.0051**</b>      | 12 | <b>5.3% Cost</b>       |
|                                    | 42.2°C in LB     | A <sup>Rif</sup> 1 | I572F        | 0.868 $\pm$ 0.014                              | <b>0.0001***</b>     | 6  | <b>13% Cost</b>        |
|                                    |                  | A <sup>Rif</sup> 2 | I572L        | 0.836 $\pm$ 0.033                              | <b>0.002**</b>       | 6  | <b>13% Cost</b>        |
|                                    |                  | A <sup>Rif</sup> 3 | I572N        | 0.928 $\pm$ 0.030                              | <b>0.03*</b>         | 6  | <b>9.8% Cost</b>       |
| REL 606                            | 42.2°C in DM25   | R <sup>Rif</sup> 1 | I572F        | 1.286 $\pm$ 0.030                              | <b>&lt;0.0001***</b> | 6  | <b>28.6% Advantage</b> |
|                                    |                  | R <sup>Rif</sup> 2 | I572L        | 1.302 $\pm$ 0.036                              | <b>0.0002***</b>     | 6  | <b>30.2% Advantage</b> |
|                                    |                  | R <sup>Rif</sup> 3 | I572N        | 1.297 $\pm$ 0.038                              | <b>0.0003***</b>     | 6  | <b>29.7% Advantage</b> |
| K12<br>(MG1655)                    | 42.2°C in DM25   | K <sup>Rif</sup> 1 | I572F        | 0.908 $\pm$ 0.018                              | <b>0.0004***</b>     | 6  | <b>9.2% Cost</b>       |
|                                    |                  | K <sup>Rif</sup> 2 | I572L        | 0.975 $\pm$ 0.010                              | <b>0.0218*</b>       | 6  | <b>2.5% Cost</b>       |

<sup>1</sup>Mean relative fitness and 95% confidence interval based on n replicates.

<sup>2</sup>Significance values based on one-tailed t-distribution with n-1 degrees of freedom; the null hypothesis is that the mean fitness equals 1.
